# Supplementary material for: Interaction of Haemagogus leucocelaenus (Diptera: Culicidae) and Other Mosquito Vectors in a Forested Area, Rio de Janeiro, Brazil
Source: MDPI journal article supplement (doi:10.3390/tropicalmed7060094), 2022-06-08
Supplement: s1 [file s1]

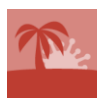

**Table S1.** Abundance of eggs of Culicidae species *Hg. leucocelaenus*, *Hg. janthinomys*, *Ae. albopictus*, and *Ae. terrens* at the collection sites in RPPN Gaviões, from September 2019 to January 2021.

| Ovitrap      | <i>Haemagogus leu-<br/>cocelaenus</i> | <i>Haemagogus jan-<br/>thinomys</i> | <i>Aedes albopictus</i> | <i>Aedes terrens</i> |
|--------------|---------------------------------------|-------------------------------------|-------------------------|----------------------|
| 1            | 12                                    | 0                                   | 0                       | 0                    |
| 2            | 17                                    | 0                                   | 0                       | 0                    |
| 3            | 68                                    | 3                                   | 27                      | 12                   |
| 4            | 75                                    | 30                                  | 5                       | 0                    |
| 5            | 272                                   | 13                                  | 1                       | 5                    |
| 6            | 76                                    | 2                                   | 0                       | 0                    |
| 7            | 6                                     | 0                                   | 0                       | 0                    |
| 8            | 183                                   | 1                                   | 0                       | 0                    |
| 9            | 320                                   | 13                                  | 7                       | 71                   |
| 10           | 12                                    | 0                                   | 0                       | 0                    |
| <b>Total</b> | <b>1041</b>                           | <b>62</b>                           | <b>40</b>               | <b>88</b>            |
